# Supplementary material for: Molecular interactions driving the complexation of rose bengal by triazine-carbosilane dendrons
Source: Royal Society of Chemistry journal article supplement (doi:10.1039/d4nr02335h), 2024-11-27
Supplement: d4nr02335h1.pdf [file d4nr02335h1.pdf]

## MOLECULAR INTERACTIONS DRIVING THE COMPLEXATION OF ROSE BENGAL BY TRIAZINE-CARBOSILANE DENDRONS

E. A. Zizzi<sup>1</sup>, K. Sztandera<sup>2,3,4</sup>, M. Gorzkiewicz<sup>4,5</sup>, A. Buczkowski<sup>6</sup>, E. Apartsin<sup>7</sup>, M. A. Deriu<sup>1</sup>,  
B. Klajnert-Maculewicz<sup>4</sup>

### SUPPLEMENTARY INFORMATION

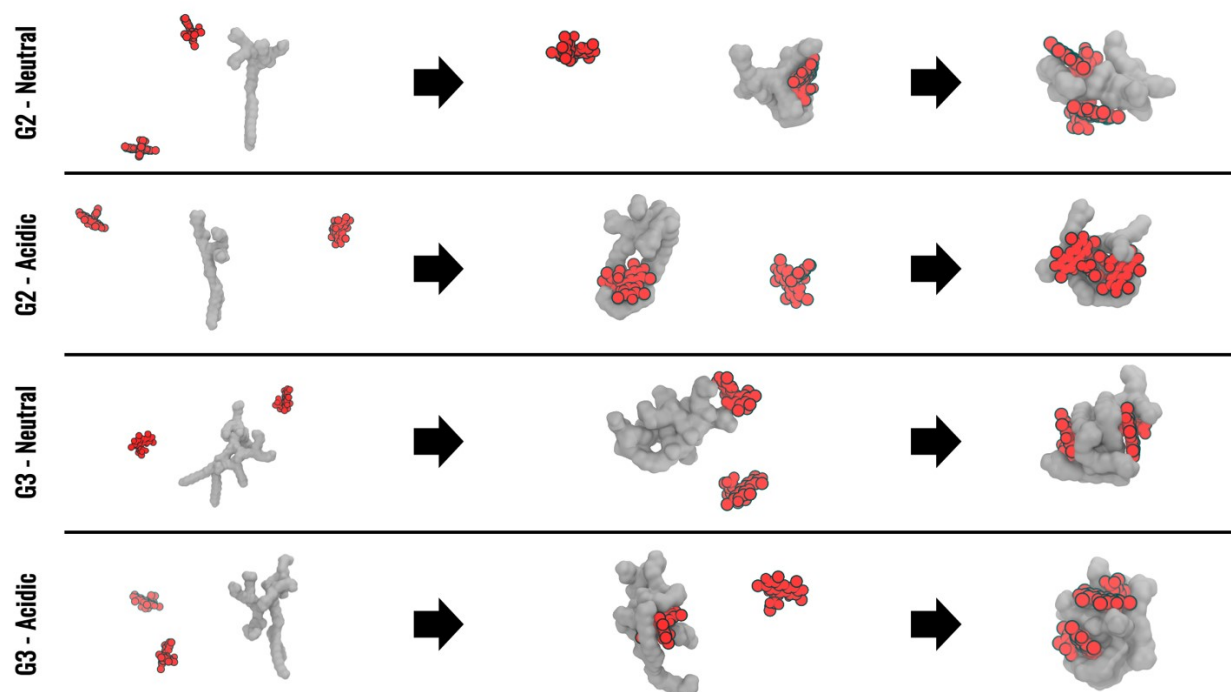

*Supplementary Figure 1. Visualization of the process of dendron-RB complex formation at 1:2 stoichiometry, for different dendron generations and pH conditions. Left column represents initial configuration, prior to complex formation. Middle column reports snapshots during complex formation, with one RB molecule bound to the dendron. Rightmost column represents final snapshot of 2 RB molecules in complex with the dendrons. Dendrons shown in grey, RB molecules in red.*

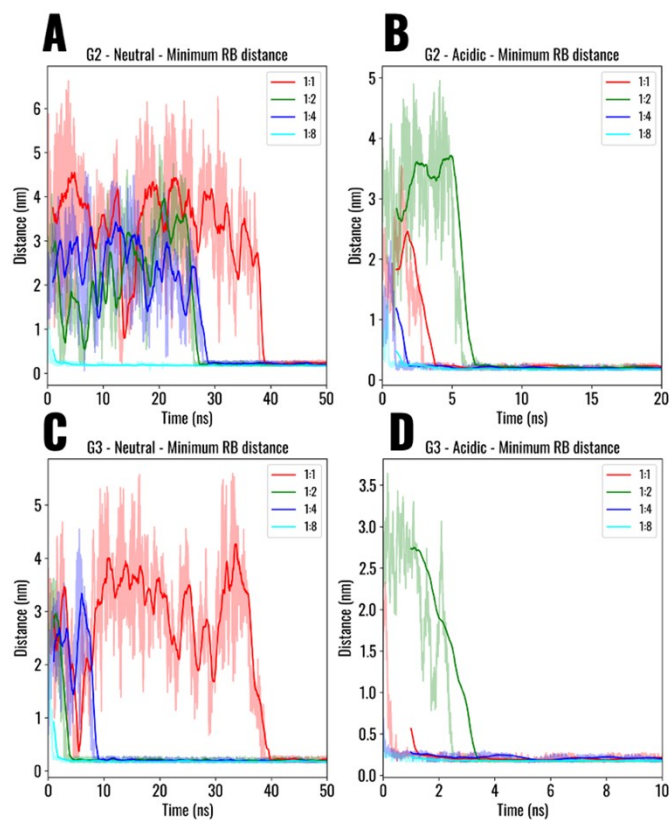

Supplementary Figure 2. Minimum distance vs. time between Rose Bengal atoms and dendron atoms. A: G2 – neutral pH; B: G2 – acidic pH; C: G3 – neutral pH; D: G3 – acidic pH. Solid line represents moving average over 1-ns windows. Raw data sampled every 2 ps shown as a faded line.

## LIST OF SUPPLEMENTARY VIDEOS

- SV1:** rendering of MD simulation of system G2c
- SV2:** rendering of MD simulation of system G2\_1:2
- SV3:** rendering of MD simulation of system G2\_1:4
- SV4:** rendering of MD simulation of system G2ac
- SV5:** rendering of MD simulation of system G2a\_1:2
- SV6:** rendering of MD simulation of system G2a\_1:4
- SV7:** rendering of MD simulation of system G3c
- SV8:** rendering of MD simulation of system G3\_1:2
- SV9:** rendering of MD simulation of system G3\_1:4
- SV10:** rendering of MD simulation of system G3ac
- SV11:** rendering of MD simulation of system G3a\_1:2
- SV12:** rendering of MD simulation of system G3a\_1:4
